# Supplementary material for: The FES Gene at the 15q26 Coronary-Artery-Disease Locus Inhibits Atherosclerosis
Source: PubMed Central journal article supplement — Circ Res. 2022 Nov 2;131(12):1004–17. doi: 10.1161/CIRCRESAHA.122.321146 (PMC9770135; doi:10.1161/circresaha.122.321146), 2022-11-02

**Full unedited gel for Figure 2A**

Arrows indicate lanes/bands shown in the cropped image in the figure

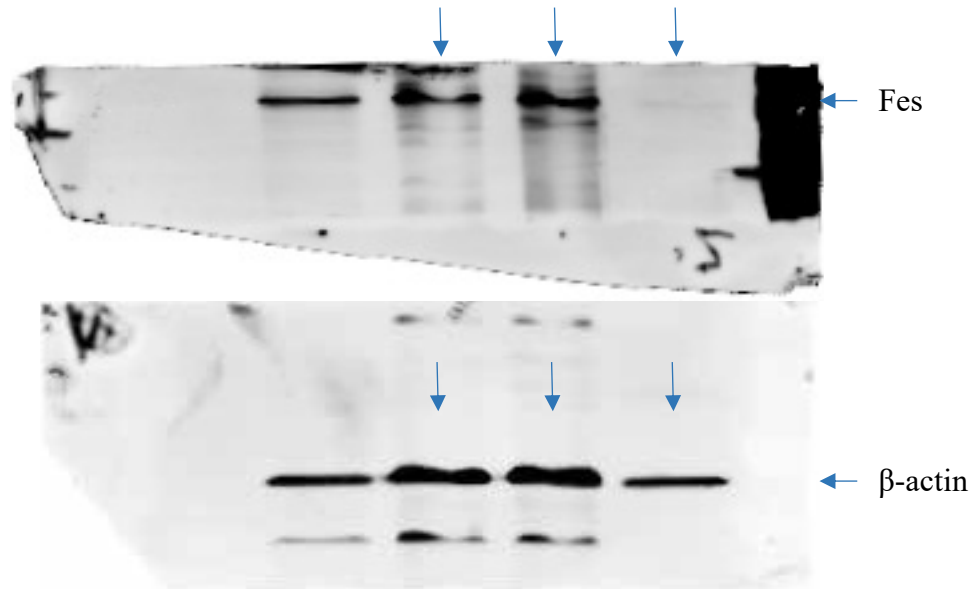

**Full unedited gel for Figure 2B**

Arrows indicate lanes/bands shown in the cropped image in the figure

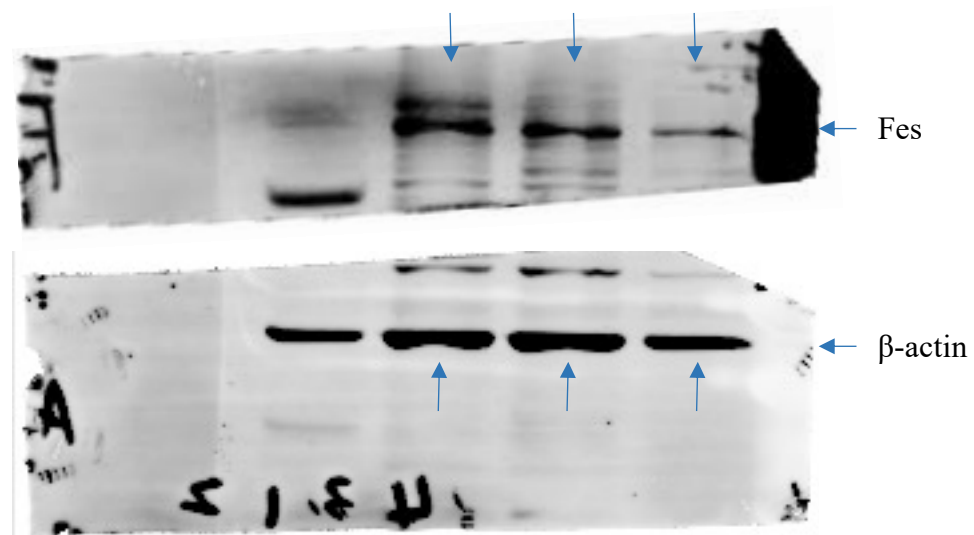

**Full unedited gel for Figure 3A**

Arrows indicate lanes shown in the cropped image in the figure.

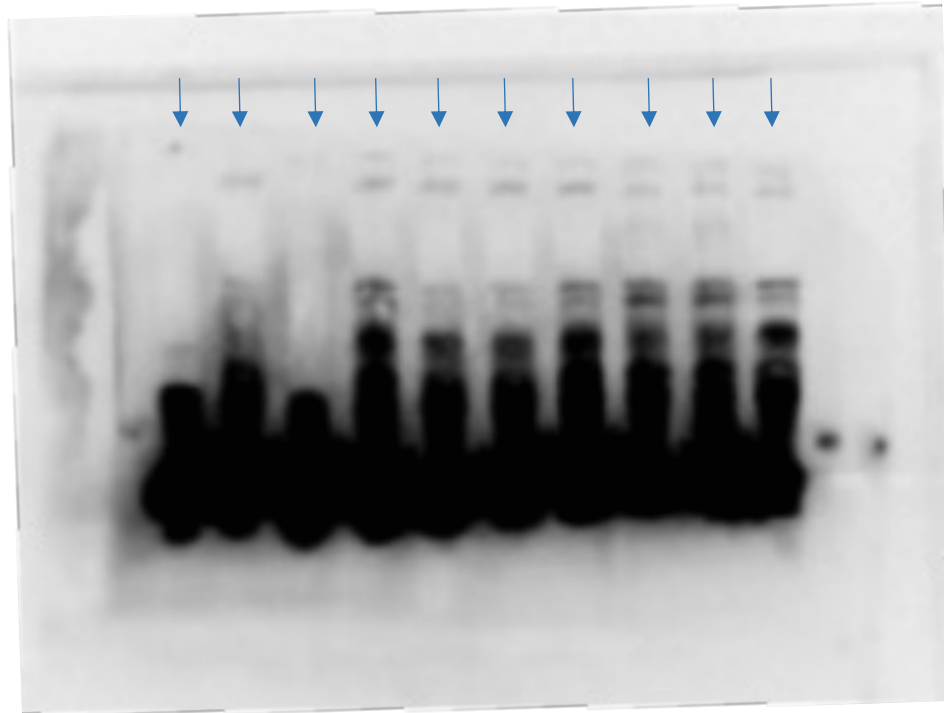

**Full unedited gel for Figure 3B**

Arrows indicate lanes shown in the cropped image in the figure

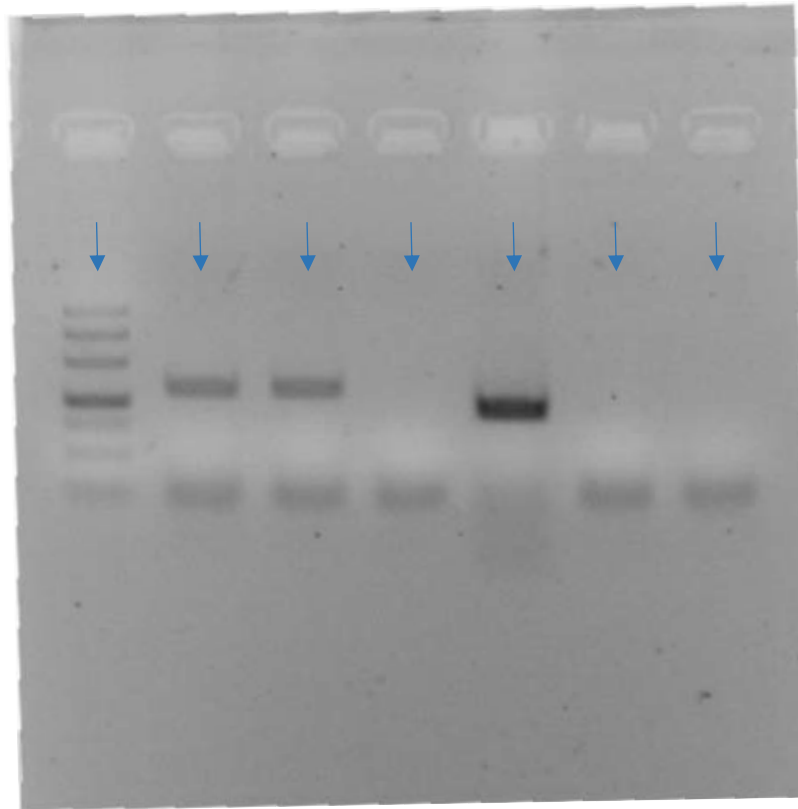

**Full unedited gel for Figure 3E**

Arrows indicate lanes/bands shown in the cropped image in the figure

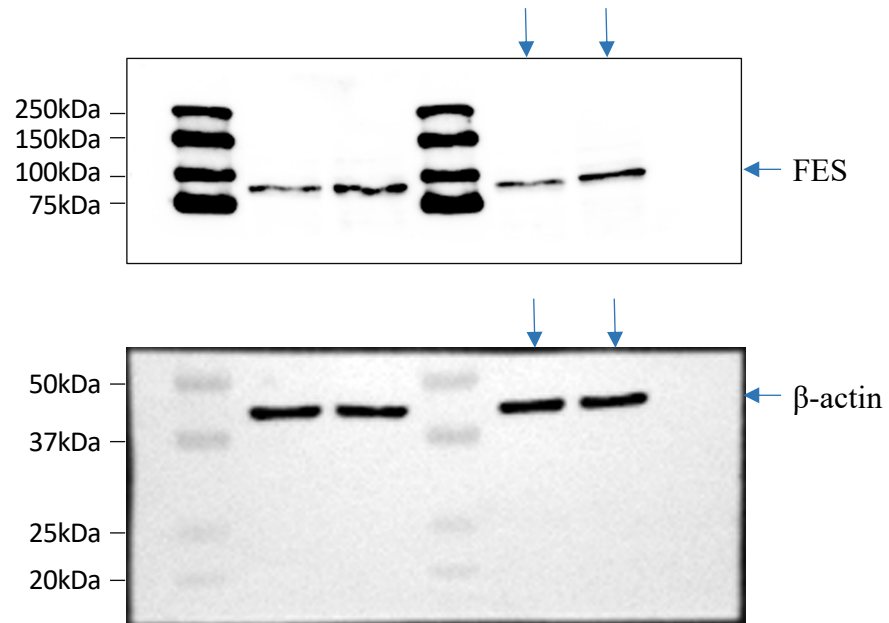

**Full unedited gel for Figure S1.**

Arrows indicate lanes/bands shown in the cropped image in the figure

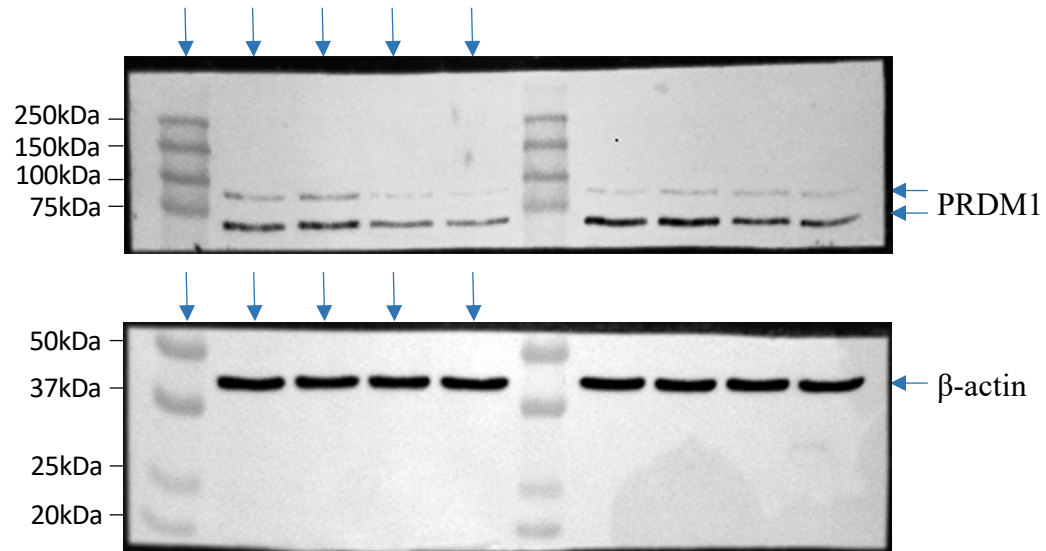

**Full unedited gel for Figure S2A**

Arrows indicate lanes/bands shown in the cropped image in the figure

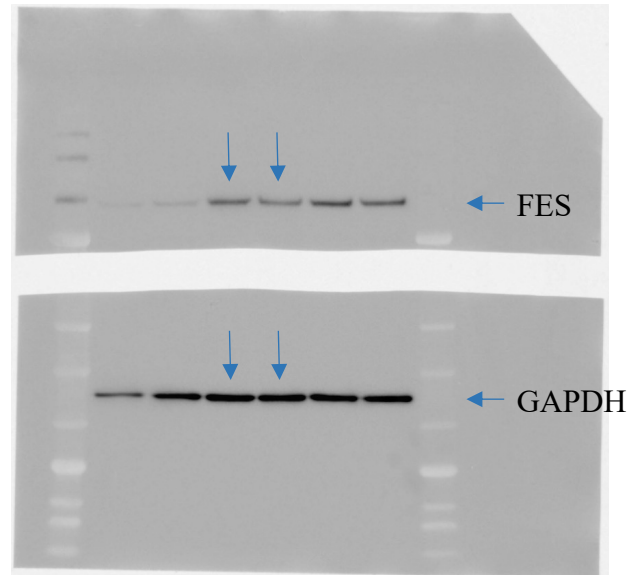

**Full unedited gel for Figure S2B**

Arrows indicate lanes/bands shown in the cropped image in the figure

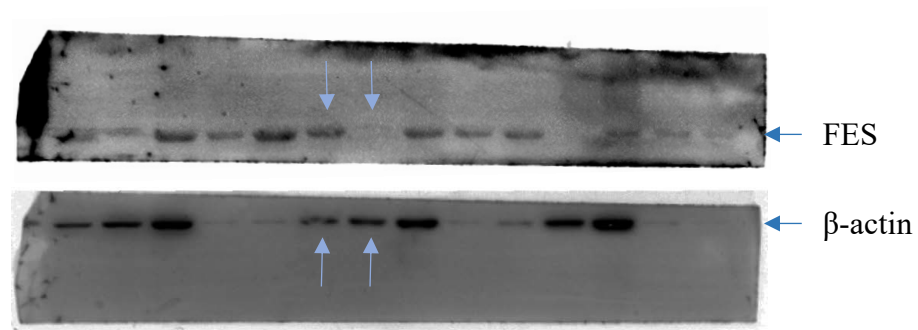



**Full unedited gel for Figure S2C**

Arrows indicate lanes/bands shown in the cropped image in the figure

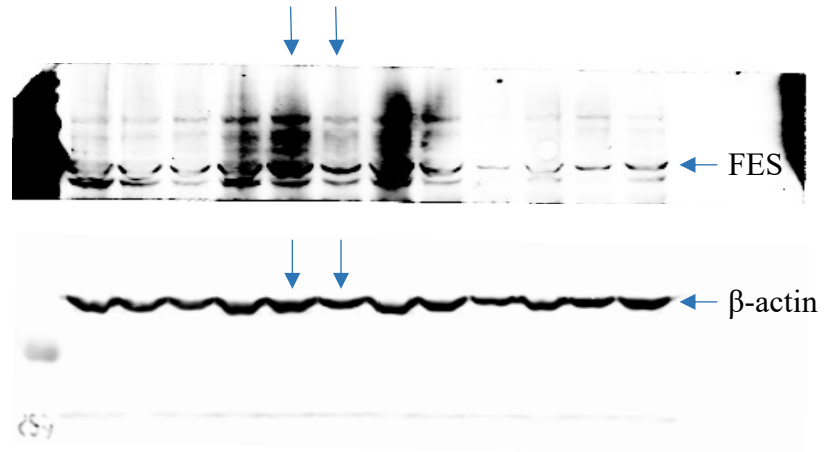

**Full unedited gel for Figure S3**

Arrows indicate lanes shown in the cropped image in the figure

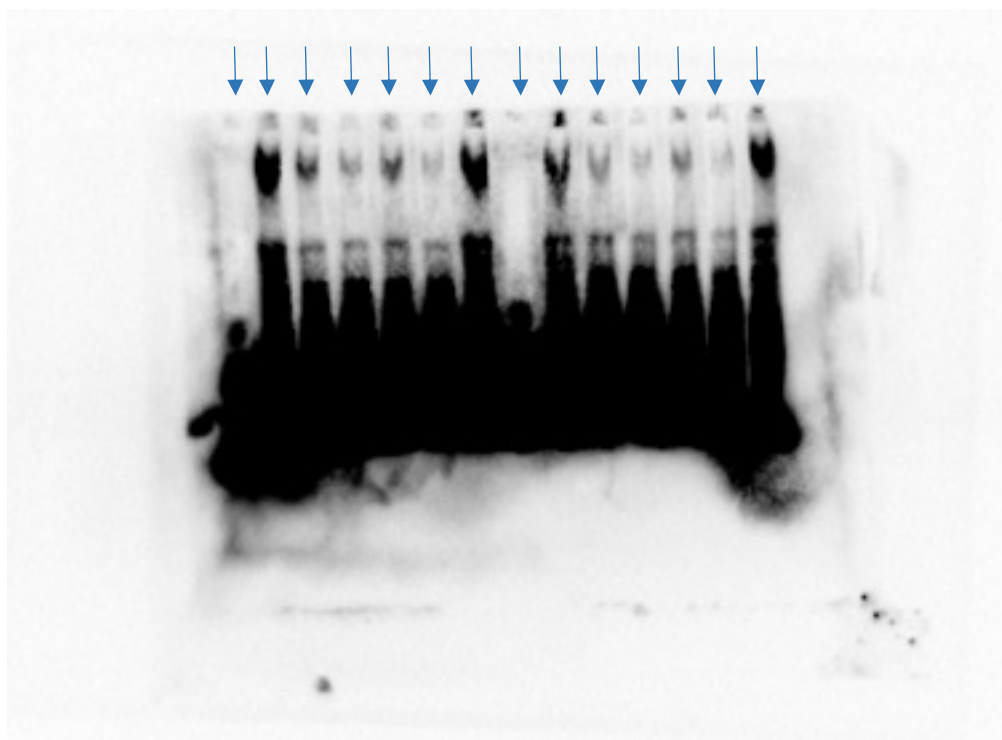

**Full unedited gel for Figure S13A**

Arrows indicate lanes/bands shown in the cropped image in the figure

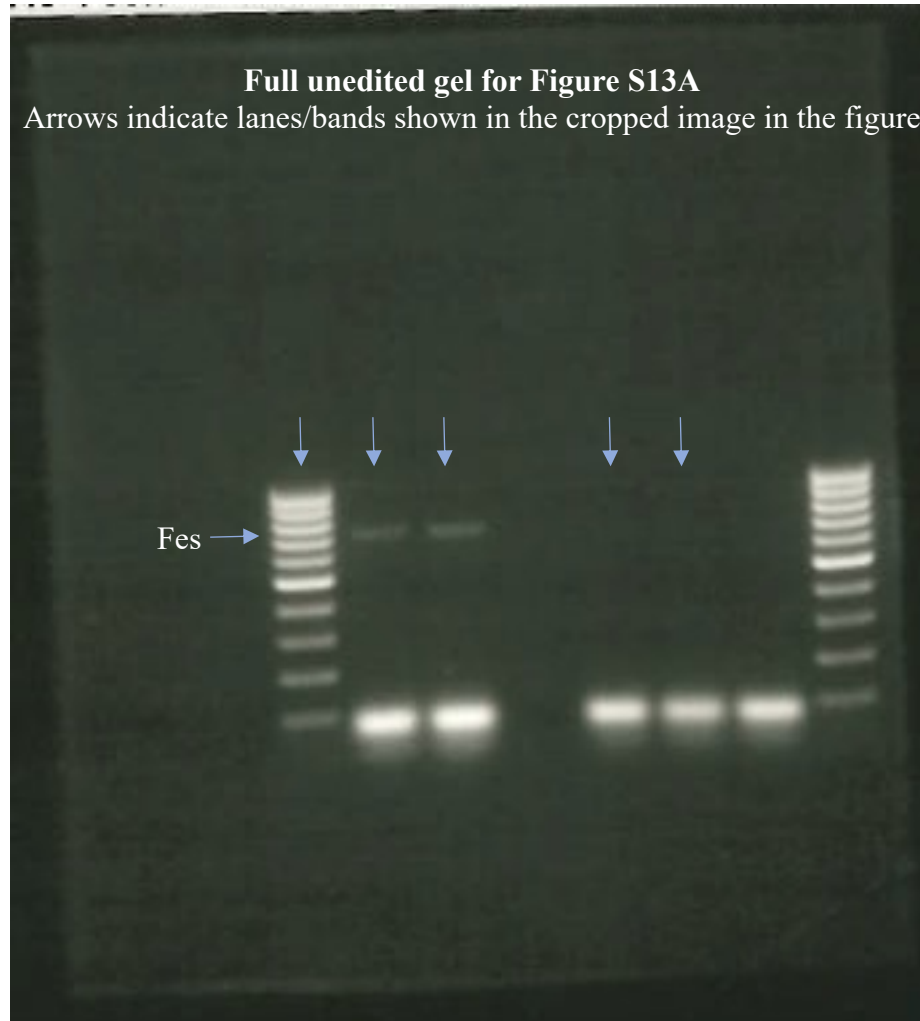

**Full unedited gel for Figure S13B**

Arrows indicate lanes/bands shown in the cropped image in the figure

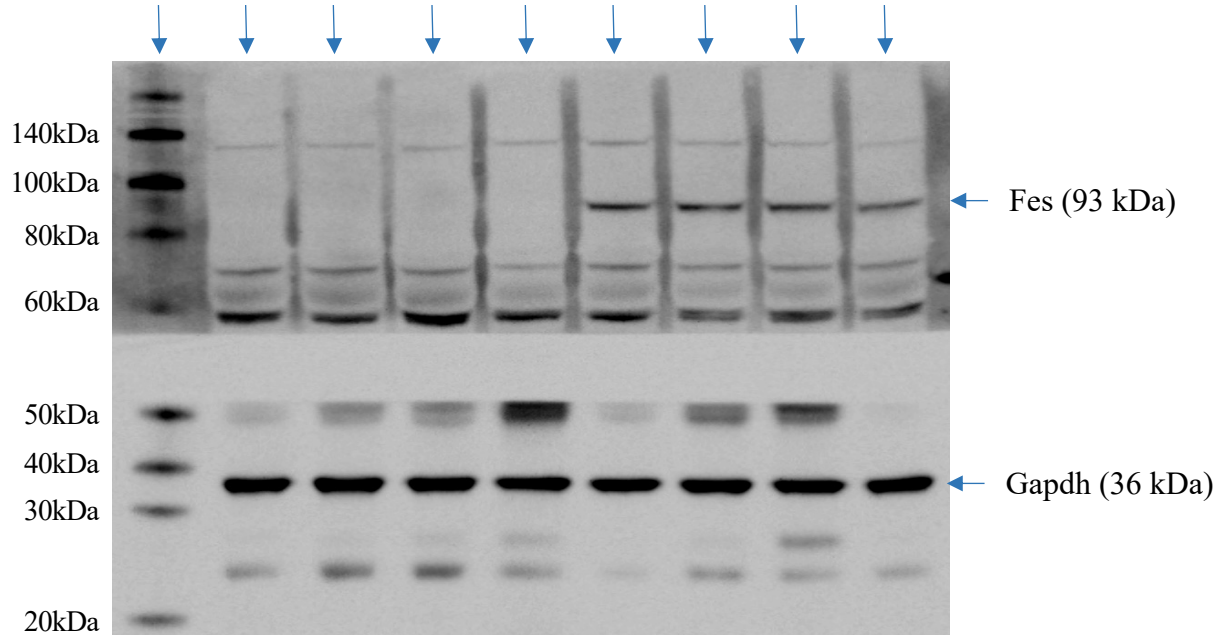

Supplement: res-131-1004-s005.pdf [file res-131-1004-s005.pdf]
