# Supplementary material for: The FES Gene at the 15q26 Coronary-Artery-Disease Locus Inhibits Atherosclerosis
Source: PubMed Central journal article supplement — Circ Res. 2022 Nov 2;131(12):1004–17. doi: 10.1161/CIRCRESAHA.122.321146 (PMC9770135; doi:10.1161/circresaha.122.321146), 2022-11-02
Supplement: res-131-1004-s003.pdf [file res-131-1004-s003.pdf]

## Major Resources Table

In order to allow validation and replication of experiments, all essential research materials listed in the Methods should be included in the Major Resources Table below. Authors are encouraged to use public repositories for protocols, data, code, and other materials and provide persistent identifiers and/or links to repositories when available. Authors may add or delete rows as needed.

### Animals (in vivo studies)

| Species | Vendor or Source | Background Strain | Sex | Persistent ID / URL |
|---------|------------------|-------------------|-----|---------------------|
|         |                  |                   |     |                     |
|         |                  |                   |     |                     |
|         |                  |                   |     |                     |

### Genetically Modified Animals

|                 | Species | Vendor or Source                            | Background Strain | Other Information         | Persistent ID / URL                                                               |
|-----------------|---------|---------------------------------------------|-------------------|---------------------------|-----------------------------------------------------------------------------------|
| Parent - Male   | Mouse   | Zirngibl <i>et al.</i> (2002) <sup>23</sup> | 129SvJ and CD1    | Fes <sup>-/-</sup>        |                                                                                   |
| Parent - Female | Mouse   | Zirngibl <i>et al.</i> (2002) <sup>23</sup> | 129SvJ and CD1    | Fes <sup>-/-</sup>        |                                                                                   |
| Parent - Male   | Mouse   |                                             | C57BL6/J          |                           |                                                                                   |
| Parent - Female | Mouse   |                                             | C57BL6/J          |                           |                                                                                   |
| Parent - Male   | Mouse   | Jackson Laboratory                          | B6.129P2          | Apoe <sup>tm1Unc</sup> /J | <a href="https://www.jax.org/strain/002052">https://www.jax.org/strain/002052</a> |
| Parent - Female | Mouse   | Jackson Laboratory                          | B6.129P2          | Apoe <sup>tm1Unc</sup> /J | <a href="https://www.jax.org/strain/002052">https://www.jax.org/strain/002052</a> |

### Antibodies

| Target antigen | Vendor or Source | Catalog # | Working concentration                                            | Lot # (preferred but not required) | Persistent ID / URL                                                                                                                                                                                                                                                                                                         |
|----------------|------------------|-----------|------------------------------------------------------------------|------------------------------------|-----------------------------------------------------------------------------------------------------------------------------------------------------------------------------------------------------------------------------------------------------------------------------------------------------------------------------|
| PRDM1          | ThermoFisher     | MA1-16874 | 1:1000<br>(Immunoblotting)<br>8-10µg/20µl<br>(Super-shift assay) |                                    | <a href="https://www.thermofisher.com/antibody/product/Blimp-1-Antibody-clone-3H2-E8-Monoclonal/MA1-16874">https://www.thermofisher.com/antibody/product/Blimp-1-Antibody-clone-3H2-E8-Monoclonal/MA1-16874</a>                                                                                                             |
| β-actin        | Sigma            | A1978     | 1:4000                                                           |                                    | <a href="https://www.sigmaaldrich.com/SG/en/product/sigma/a1978?gclid=Cj0KQjwnNyUBhCZARIsAI9AYIH8SPKS-1qAWjv6s6JKcWJ5T0lw9EkYMtc_o4bmtQIBUh1nIMz9waAo2IEALw_wcB">https://www.sigmaaldrich.com/SG/en/product/sigma/a1978?gclid=Cj0KQjwnNyUBhCZARIsAI9AYIH8SPKS-1qAWjv6s6JKcWJ5T0lw9EkYMtc_o4bmtQIBUh1nIMz9waAo2IEALw_wcB</a> |
| FES            | Abcam            | ab108418  | 1:1000                                                           |                                    | <a href="https://www.abcam.com/FES-antibody-EPR32302-ab108418.html">https://www.abcam.com/FES-antibody-EPR32302-ab108418.html</a>                                                                                                                                                                                           |
| H3K9ac         | Sigma-Aldrich    | 06-942    | 5µg/500µl                                                        |                                    | <a href="https://www.sigmaaldrich.com/SG/en/product/mm/06942">https://www.sigmaaldrich.com/SG/en/product/mm/06942</a>                                                                                                                                                                                                       |
| Rabbit IgG     | Abcam            | ab37415   | 5µg/500µl                                                        |                                    | <a href="https://www.abcam.com/rabbit-igg-polyclonal-isotype-control-ab37415.html">https://www.abcam.com/rabbit-igg-polyclonal-isotype-control-ab37415.html</a>                                                                                                                                                             |

|            |                         |             |                                     |  |                                                                                                                                                                                                                                                                             |
|------------|-------------------------|-------------|-------------------------------------|--|-----------------------------------------------------------------------------------------------------------------------------------------------------------------------------------------------------------------------------------------------------------------------------|
| m-IgGk BP  | Santa Cruz Biotech      | SC-516102   | 1:2000                              |  | <a href="https://www.scbt.com/p/m-igg-kappa-bp-hrp">https://www.scbt.com/p/m-igg-kappa-bp-hrp</a>                                                                                                                                                                           |
| rabbit IgG | Santa Cruz Biotech      | SC-2357     | 1:2000                              |  | <a href="https://www.scbt.com/p/mouse-anti-rabbit-igg-hrp">https://www.scbt.com/p/mouse-anti-rabbit-igg-hrp</a>                                                                                                                                                             |
| β-actin    | Sangon Biotech          | D110001     | 1:1000                              |  | <a href="http://www.life-biotech.com/product/productDetailForEN.html?productID=102761&amp;sumProductID=102761">http://www.life-biotech.com/product/productDetailForEN.html?productID=102761&amp;sumProductID=102761</a>                                                     |
| Mouse IgG  | Immunoway Biotechnology | RS23710     | 1:5000                              |  | <a href="http://www.immunoway.com/CHome/22/RS23710">http://www.immunoway.com/CHome/22/RS23710</a>                                                                                                                                                                           |
| human CD14 | Miltenyi Biotec         | 130-110-576 | 1:50                                |  | <a href="https://www.miltenyibiotec.com/SG-en/products/cd14-antibody-anti-human-reafinity-rea599.html#fitc:30-tests-in-60-ul">https://www.miltenyibiotec.com/SG-en/products/cd14-antibody-anti-human-reafinity-rea599.html#fitc:30-tests-in-60-ul</a>                       |
| human IgG1 | Miltenyi Biotec         | 130-113-437 | 1:50                                |  | <a href="https://www.miltenyibiotec.com/SG-en/products/rea-control-antibody-s-human-igg1-reafinity-rea293.html#fitc:100-tests-in-200-ul">https://www.miltenyibiotec.com/SG-en/products/rea-control-antibody-s-human-igg1-reafinity-rea293.html#fitc:100-tests-in-200-ul</a> |
| Rabbit IgG | Li-Cor Bioscience       | 926-32211   | 1:10000                             |  | <a href="https://www.licor.com/bio/reagents/irdye-800cw-goat-anti-rabbit-igg-secondary-antibody">https://www.licor.com/bio/reagents/irdye-800cw-goat-anti-rabbit-igg-secondary-antibody</a>                                                                                 |
| Rabbit IgG | Sigma-Aldrich           | A6154       | 1:1000                              |  | <a href="https://www.sigmaaldrich.com/SG/en/product/sigma/a6154">https://www.sigmaaldrich.com/SG/en/product/sigma/a6154</a>                                                                                                                                                 |
| MOMA2      | Bio-Rad                 | MCA519G     | 1:250                               |  | <a href="https://www.bio-rad-antibodies.com/monoclonal/mouse-macrophages-monocytes-antibody-moma-2-mca519.html?f=purified">https://www.bio-rad-antibodies.com/monoclonal/mouse-macrophages-monocytes-antibody-moma-2-mca519.html?f=purified</a>                             |
| Rat IgG    | Vector Laboratories     | MP-7444     | Ready to use as supplied            |  | <a href="https://vectorlabs.com/immpress-hrp-anti-rat-igg-mouse-adsorbed-peroxidase-polymer-detection-kit.html">https://vectorlabs.com/immpress-hrp-anti-rat-igg-mouse-adsorbed-peroxidase-polymer-detection-kit.html</a>                                                   |
| Rabbit IgG | Vector Laboratories     | MP-7451     | Ready to use as supplied            |  | <a href="https://vectorlabs.com/immpress-hrp-goat-anti-rabbit-igg-peroxidase-polymer-detection-kit.html">https://vectorlabs.com/immpress-hrp-goat-anti-rabbit-igg-peroxidase-polymer-detection-kit.html</a>                                                                 |
| CD68       | Dako                    | PG-M1       | 1:30 of stock concentration 30µg/ml |  | <a href="https://www.agilent.com/en/product/immunohistochemistry/antibodies-controls/primary-antibodies/cd68-(dako-omnis)-76227">https://www.agilent.com/en/product/immunohistochemistry/antibodies-controls/primary-antibodies/cd68-(dako-omnis)-76227</a>                 |
| SMA        | Dako                    | M-0635      | 1:200                               |  | <a href="https://www.agilent.com/store/productDetail.jsp?catalogId=M063501-2">https://www.agilent.com/store/productDetail.jsp?catalogId=M063501-2</a>                                                                                                                       |
| Mouse IgM  | Vector Laboratories     | BA-2020-.5  | 1:300                               |  | <a href="https://vectorlabs.com/products/antibodies/biotinylated-goat-anti-mouse-igm-mu-chain">https://vectorlabs.com/products/antibodies/biotinylated-goat-anti-mouse-igm-mu-chain</a>                                                                                     |
| FES        | Abcam                   | ab153841    | 1:500                               |  | <a href="https://www.abcam.com/fes-antibody-ab153841.html">https://www.abcam.com/fes-antibody-ab153841.html</a>                                                                                                                                                             |

|            |               |           |           |  |                                                                                                                                                                                                                                                                                   |
|------------|---------------|-----------|-----------|--|-----------------------------------------------------------------------------------------------------------------------------------------------------------------------------------------------------------------------------------------------------------------------------------|
| Iba1       | Abcam         | ab15690   | 1:100     |  | <a href="https://www.abcam.com/iba1-antibody-1022-5-ab15690.html">https://www.abcam.com/iba1-antibody-1022-5-ab15690.html</a>                                                                                                                                                     |
| Rabbit IgG | ThermoFisher  | A32731    | 1:300     |  | <a href="https://www.thermofisher.com/antibody/product/Goat-anti-Rabbit-IgG-H-L-Highly-Cross-Adsorbed-Secondary-Antibody-Polyclonal/A32731">https://www.thermofisher.com/antibody/product/Goat-anti-Rabbit-IgG-H-L-Highly-Cross-Adsorbed-Secondary-Antibody-Polyclonal/A32731</a> |
| Mouse IgG  | ThermoFisher  | A32728    | 1:300     |  | <a href="https://www.thermofisher.com/antibody/product/Goat-anti-Mouse-IgG-H-L-Highly-Cross-Adsorbed-Secondary-Antibody-Polyclonal/A32728">https://www.thermofisher.com/antibody/product/Goat-anti-Mouse-IgG-H-L-Highly-Cross-Adsorbed-Secondary-Antibody-Polyclonal/A32728</a>   |
| Gapdh      | Proteintech   | 60004-1   | 1:2500    |  | <a href="https://www.ptglab.com/products/GAPDH-Antibody-60004-1-Ig.htm">https://www.ptglab.com/products/GAPDH-Antibody-60004-1-Ig.htm</a>                                                                                                                                         |
| Mouse IgG  | Sigma-Aldrich | A4416     | 1:4000    |  | <a href="https://www.sigmaaldrich.com/SG/en/product/sigma/a4416">https://www.sigmaaldrich.com/SG/en/product/sigma/a4416</a>                                                                                                                                                       |
| Fes        | Abcam         | ab153841  | 2µg/ml    |  | <a href="https://www.abcam.com/fes-antibody-ab153841.html">https://www.abcam.com/fes-antibody-ab153841.html</a>                                                                                                                                                                   |
| Rabbit IgG | ThermoFisher  | 10500C    | 2µg/ml    |  | <a href="https://www.thermofisher.com/antibody/product/Rabbit-IgG-Isotype-Control/10500C">https://www.thermofisher.com/antibody/product/Rabbit-IgG-Isotype-Control/10500C</a>                                                                                                     |
| Mouse IgG  | ThermoFisher  | 10400C    | 2µg/ml    |  | <a href="https://www.thermofisher.com/antibody/product/Mouse-IgG-Isotype-Control/10400C">https://www.thermofisher.com/antibody/product/Mouse-IgG-Isotype-Control/10400C</a>                                                                                                       |
| αSMA       | Sigma-Aldrich | A5228     | 5µg/ml    |  | <a href="https://www.sigmaaldrich.com/GB/en/product/sigma/a5228">https://www.sigmaaldrich.com/GB/en/product/sigma/a5228</a>                                                                                                                                                       |
| Mouse IgG  | ThermoFisher  | MA5-14453 | 10µg/20µl |  | <a href="https://www.thermofisher.com/antibody/product/Mouse-IgG1-clone-NCG01-Isotype-Control/MA5-14453">https://www.thermofisher.com/antibody/product/Mouse-IgG1-clone-NCG01-Isotype-Control/MA5-14453</a>                                                                       |
| Rabbit IgG | ThermoFisher  | A11008    | 2µg/ml    |  | <a href="https://www.thermofisher.com/antibody/product/Goat-anti-Rabbit-IgG-H-L-Cross-Adsorbed-Secondary-Antibody-Polyclonal/A-11008">https://www.thermofisher.com/antibody/product/Goat-anti-Rabbit-IgG-H-L-Cross-Adsorbed-Secondary-Antibody-Polyclonal/A-11008</a>             |
| Mouse IgG  | ThermoFisher  | A21422    | 2µg/ml    |  | <a href="https://www.thermofisher.com/antibody/product/Goat-anti-Mouse-IgG-H-L-Cross-Adsorbed-Secondary-Antibody-Polyclonal/A-21422">https://www.thermofisher.com/antibody/product/Goat-anti-Mouse-IgG-H-L-Cross-Adsorbed-Secondary-Antibody-Polyclonal/A-21422</a>               |

#### DNA/cDNA Clones

| Clone Name | Sequence | Source / Repository | Persistent ID / URL |
|------------|----------|---------------------|---------------------|
|            |          |                     |                     |
|            |          |                     |                     |
|            |          |                     |                     |

#### Cultured Cells

| Name | Vendor or Source | Sex (F, M, or unknown) | Persistent ID / URL |
|------|------------------|------------------------|---------------------|
|      |                  |                        |                     |

|                                                   |                   |         |                                                                                                                                                                                   |
|---------------------------------------------------|-------------------|---------|-----------------------------------------------------------------------------------------------------------------------------------------------------------------------------------|
| THP-1                                             | ATCC              | M       | <a href="https://www.atcc.org/products/tib-202">https://www.atcc.org/products/tib-202</a>                                                                                         |
| HUVECs                                            |                   | Unknown |                                                                                                                                                                                   |
| Primary human coronary artery smooth muscle cells | Cell Applications | Unknown | <a href="https://www.cellapplications.com/human-coronary-artery-smooth-muscle-cells-hcasmc">https://www.cellapplications.com/human-coronary-artery-smooth-muscle-cells-hcasmc</a> |
| RAW264.7                                          | ATCC              | M       | <a href="https://www.atcc.org/products/tib-71">https://www.atcc.org/products/tib-71</a>                                                                                           |

## Data & Code Availability

| Description                                                        | Source / Repository                               | Persistent ID / URL            |
|--------------------------------------------------------------------|---------------------------------------------------|--------------------------------|
| Single-cell RNA-sequencing data from human atherosclerotic plaques | Dr Sander W. van der Laan (University of Utrecht) | s.w.vanderlaan-2@umcutrecht.nl |
|                                                                    |                                                   |                                |

## Other

| Description                                  | Source / Repository   | Persistent ID / URL                                                                                                                                                                                                                                                                                                                                           |
|----------------------------------------------|-----------------------|---------------------------------------------------------------------------------------------------------------------------------------------------------------------------------------------------------------------------------------------------------------------------------------------------------------------------------------------------------------|
| Lymphoprep                                   | STEMCELL Technologies | <a href="https://www.stemcell.com/lymphoprep.html">https://www.stemcell.com/lymphoprep.html</a>                                                                                                                                                                                                                                                               |
| CD14 MicroBeads                              | Miltenyi Biotec       | <a href="https://www.miltenyibiotec.com/SG-en/products/cd14-microbeads-human.html#gref">https://www.miltenyibiotec.com/SG-en/products/cd14-microbeads-human.html#gref</a>                                                                                                                                                                                     |
| G418                                         | ThermoFisher          | <a href="https://www.thermofisher.com/order/catalog/product/10131035#/10131035">https://www.thermofisher.com/order/catalog/product/10131035#/10131035</a>                                                                                                                                                                                                     |
| p-U6-sgRNA-EFS-Cas9-T2A-EGFP-WPRE            | HongLi Technology     | <a href="http://www.bioon.com.cn/show/index_269298.html">http://www.bioon.com.cn/show/index_269298.html</a>                                                                                                                                                                                                                                                   |
| LentiCas9-Blast                              | Addgene               | <a href="https://www.addgene.org/52962/">https://www.addgene.org/52962/</a>                                                                                                                                                                                                                                                                                   |
| LentiGuide-Puro                              | Addgene               | <a href="https://www.addgene.org/52963/">https://www.addgene.org/52963/</a>                                                                                                                                                                                                                                                                                   |
| blasticidin                                  | blasticidin           | <a href="https://www.thermofisher.com/order/catalog/product/A1113903?SID=srch-hj-A1113903">https://www.thermofisher.com/order/catalog/product/A1113903?SID=srch-hj-A1113903</a>                                                                                                                                                                               |
| Puromycin                                    | ThermoFisher          | <a href="https://www.thermofisher.com/order/catalog/product/A1113803?SID=srch-hj-A1113803">https://www.thermofisher.com/order/catalog/product/A1113803?SID=srch-hj-A1113803</a>                                                                                                                                                                               |
| Histopaque-1077                              | Sigma                 | <a href="https://www.sigmaaldrich.com/SG/en/product/sigma/h8889?gclid=CjwKCAjw6raYBhB7EiwABge5Kj4bSBlryh5QbnWvzZABt7wO_kw6snS28mh20mcT9TtYL8TTXjNlgBoCeUcQAvD_BwE">https://www.sigmaaldrich.com/SG/en/product/sigma/h8889?gclid=CjwKCAjw6raYBhB7EiwABge5Kj4bSBlryh5QbnWvzZABt7wO_kw6snS28mh20mcT9TtYL8TTXjNlgBoCeUcQAvD_BwE</a>                               |
| RPMI 1640 media                              | Sigma                 | <a href="https://www.sigmaaldrich.com/SG/en/product/sigma/r8758?gclid=CjwKCAjw6raYBhB7EiwABge5KoN1Li4-MWPI5QefntAE-xlK3J_AUDRZW-TINbRMGPOFO8Wg_MpW7BoCymYQAvD_BwE">https://www.sigmaaldrich.com/SG/en/product/sigma/r8758?gclid=CjwKCAjw6raYBhB7EiwABge5KoN1Li4-MWPI5QefntAE-xlK3J_AUDRZW-TINbRMGPOFO8Wg_MpW7BoCymYQAvD_BwE</a>                               |
| macrophage-colony stimulating factor         | Miltenyl Biotech      | <a href="https://www.miltenyibiotec.com/upload/assets/IM0001549.PDF">https://www.miltenyibiotec.com/upload/assets/IM0001549.PDF</a>                                                                                                                                                                                                                           |
| Trizol                                       | ThermoFisher          | <a href="https://www.thermofisher.com/order/catalog/product/15596018?SID=srch-srp-15596018">https://www.thermofisher.com/order/catalog/product/15596018?SID=srch-srp-15596018</a>                                                                                                                                                                             |
| High-Capacity cDNA Reverse Transcription Kit | ThermoFisher          | <a href="https://www.thermofisher.com/order/catalog/product/4368813?SID=srch-srp-4368813">https://www.thermofisher.com/order/catalog/product/4368813?SID=srch-srp-4368813</a>                                                                                                                                                                                 |
| SYBR-green qPCR master mix                   | Qiagen                | <a href="https://www.qiagen.com/us/products/discovery-and-translational-research/pcr-qpcr-dpcr/real-time-pcr-enzymes-and-kits/probe-based-qpcr/quantinova-pcr-kits/?catno=208057">https://www.qiagen.com/us/products/discovery-and-translational-research/pcr-qpcr-dpcr/real-time-pcr-enzymes-and-kits/probe-based-qpcr/quantinova-pcr-kits/?catno=208057</a> |

|                                                        |                    |                                                                                                                                                                                                                                                                                                                         |
|--------------------------------------------------------|--------------------|-------------------------------------------------------------------------------------------------------------------------------------------------------------------------------------------------------------------------------------------------------------------------------------------------------------------------|
| M-MLV reverse transcriptase                            | Promega            | <a href="https://www.promega.co.uk/products/pcr/rt-pcr/m-mlv-reverse-transcriptase/?catNum=M1701">https://www.promega.co.uk/products/pcr/rt-pcr/m-mlv-reverse-transcriptase/?catNum=M1701</a>                                                                                                                           |
| Random primers                                         | Promega            | <a href="https://www.promega.co.uk/Products/PCR/RT-PCR/Random-Primers/?catNum=C1181">https://www.promega.co.uk/Products/PCR/RT-PCR/Random-Primers/?catNum=C1181</a>                                                                                                                                                     |
| Staurosporine                                          | Alfa Aesar         | <a href="https://alfaesar.com:4433/en/catalog/J62837">https://alfaesar.com:4433/en/catalog/J62837</a>                                                                                                                                                                                                                   |
| Dead Cell Apoptosis Kits                               | ThermoFisher       | <a href="https://www.thermofisher.com/order/catalog/product/V13242">https://www.thermofisher.com/order/catalog/product/V13242</a>                                                                                                                                                                                       |
| Millicell Hanging Cell Culture Insert                  | Merck-Millipore    | <a href="https://www.sigmaaldrich.com/catalog/product/mm/mcep24h48?lang=en&amp;region=GB">https://www.sigmaaldrich.com/catalog/product/mm/mcep24h48?lang=en&amp;region=GB</a>                                                                                                                                           |
| Cell Counting Kit (CCK-8)                              | Enzo Life Sciences | <a href="https://www.enzolifesciences.com/ALX-850-039/cell-counting-kit-8/">https://www.enzolifesciences.com/ALX-850-039/cell-counting-kit-8/</a>                                                                                                                                                                       |
| FITC Annexin V Apoptosis Detection Kit I               | BD Pharmingen      | <a href="https://wwwbdbiosciences.com/eu/applications/research/apoptosis/apoptosis-kits-sets/fitc-annexin-v-apoptosis-detection-kit-i/p/556547">https://wwwbdbiosciences.com/eu/applications/research/apoptosis/apoptosis-kits-sets/fitc-annexin-v-apoptosis-detection-kit-i/p/556547</a>                               |
| Propidium iodide                                       | Sigma-Aldrich      | <a href="https://www.sigmaaldrich.com/catalog/product/sial/p4864?lang=en&amp;region=GB&amp;cm_sp=Insite-_-caContent_prodMerch_gruCrossEntropy-_-prodMerch10-2">https://www.sigmaaldrich.com/catalog/product/sial/p4864?lang=en&amp;region=GB&amp;cm_sp=Insite-_-caContent_prodMerch_gruCrossEntropy-_-prodMerch10-2</a> |
| Protease and Phosphatase Inhibitor Single-Use Cocktail | ThermoFisher       | <a href="https://www.thermofisher.com/order/catalog/product/78443?SID=srch-hj-78443">https://www.thermofisher.com/order/catalog/product/78443?SID=srch-hj-78443</a>                                                                                                                                                     |
| nitrocellulose membrane                                | BIO-RAD            | <a href="https://www.bio-rad.com/en-sg/SearchResults?search_api_fulltext=1620094">https://www.bio-rad.com/en-sg/SearchResults?search_api_fulltext=1620094</a>                                                                                                                                                           |
| Protease Inhibitor Cocktail                            | Medchemexpress     | <a href="https://www.medchemexpress.com/inhibitor-kit/protease-inhibitor-cocktail.html">https://www.medchemexpress.com/inhibitor-kit/protease-inhibitor-cocktail.html</a>                                                                                                                                               |
| cOmplete Mini Protease Inhibitor Cocktail              | Sigma-Aldrich      | <a href="https://www.sigmaaldrich.com/SG/en/product/roche/04693124001">https://www.sigmaaldrich.com/SG/en/product/roche/04693124001</a>                                                                                                                                                                                 |
| T-PER Tissue Protein Extraction Reagent                | ThermoFisher       | <a href="https://www.thermofisher.com/order/catalog/product/78510">https://www.thermofisher.com/order/catalog/product/78510</a>                                                                                                                                                                                         |
| BCA Protein Quantification Kit                         | ThermoFisher       | <a href="https://www.thermofisher.com/order/catalog/product/23227">https://www.thermofisher.com/order/catalog/product/23227</a>                                                                                                                                                                                         |
| Bis-Tris polyacrylamide gel                            | ThermoFisher       | <a href="https://www.thermofisher.com/order/catalog/product/NP0335BOX">https://www.thermofisher.com/order/catalog/product/NP0335BOX</a>                                                                                                                                                                                 |
| Amersham ECL Plus Western Blotting Detection Reagent   | VWR                | <a href="https://ie.vwr.com/store/product/3232766/western-blotting-detection-reagents-amersham-ecltm">https://ie.vwr.com/store/product/3232766/western-blotting-detection-reagents-amersham-ecltm</a>                                                                                                                   |
| Western Diet for Rodents (5TJN)                        | TestDiet           | <a href="https://www.testdiet.com/cs/groups/lolweb/@testdiet/documents/web_content/mdrf/mdi2/~edisp/duc04_026663.pdf">https://www.testdiet.com/cs/groups/lolweb/@testdiet/documents/web_content/mdrf/mdi2/~edisp/duc04_026663.pdf</a>                                                                                   |
| H&E Staining Kit                                       | Abcam              | <a href="https://www.abcam.com/he-staining-kit-hematoxylin-and-eosin-ab245880.html">https://www.abcam.com/he-staining-kit-hematoxylin-and-eosin-ab245880.html</a>                                                                                                                                                       |
| Trichrome Stain Kit                                    | Sigma-Aldrich      | <a href="https://www.sigmaaldrich.com/catalog/product/sigma/ht15?lang=en&amp;region=GB">https://www.sigmaaldrich.com/catalog/product/sigma/ht15?lang=en&amp;region=GB</a>                                                                                                                                               |
| DAPI                                                   | ThermoFisher       | <a href="https://www.thermofisher.com/order/catalog/product/D1306#/D1306">https://www.thermofisher.com/order/catalog/product/D1306#/D1306</a>                                                                                                                                                                           |
| Cholesterol Assay Kit                                  | Abcam              | <a href="https://www.abcam.com/cholesterol-assay-kit-hdl-and-ldl/ab65390.html">https://www.abcam.com/cholesterol-assay-kit-hdl-and-ldl/ab65390.html</a>                                                                                                                                                                 |

|                                             |               |                                                                                                                                                                                                                                                                                                                                     |
|---------------------------------------------|---------------|-------------------------------------------------------------------------------------------------------------------------------------------------------------------------------------------------------------------------------------------------------------------------------------------------------------------------------------|
| Triglyceride Assay Kit                      | Abcam         | <a href="https://www.abcam.com/triglyceride-assay-kit-quantification-ab65336.html">https://www.abcam.com/triglyceride-assay-kit-quantification-ab65336.html</a>                                                                                                                                                                     |
| Pierce Agarose ChIP Kit                     | ThermoFisher  | <a href="https://www.thermofisher.com/order/catalog/product/26156">https://www.thermofisher.com/order/catalog/product/26156</a>                                                                                                                                                                                                     |
| pGL3-Control Vector                         | Promega       | <a href="https://www.promega.co.uk/products/luciferase-assays/genetic-reporter-vectors-and-cell-lines/pgl3-luciferase-reporter-vectors/?catNum=E1741">https://www.promega.co.uk/products/luciferase-assays/genetic-reporter-vectors-and-cell-lines/pgl3-luciferase-reporter-vectors/?catNum=E1741</a>                               |
| pRL-TK                                      | Promega       | <a href="https://www.promega.co.uk/products/luciferase-assays/genetic-reporter-vectors-and-cell-lines/prl-renilla-luciferase-control-reporter-vectors/?catNum=E2241">https://www.promega.co.uk/products/luciferase-assays/genetic-reporter-vectors-and-cell-lines/prl-renilla-luciferase-control-reporter-vectors/?catNum=E2241</a> |
| Dual-Glo Luciferase Assay System            | Promega       | <a href="https://www.promega.co.uk/products/luciferase-assays/reporter-assays/dual_glo-luciferase-assay-system/?catNum=E2920">https://www.promega.co.uk/products/luciferase-assays/reporter-assays/dual_glo-luciferase-assay-system/?catNum=E2920</a>                                                                               |
| Stealth FES siRNA                           | ThermoFisher  | <a href="https://www.thermofisher.com/order/genome-database/details/sirna/HSS103636?CID=&amp;ICID=&amp;subtype=">https://www.thermofisher.com/order/genome-database/details/sirna/HSS103636?CID=&amp;ICID=&amp;subtype=</a>                                                                                                         |
| Stealth RNAi siRNA Negative Control, Med GC | ThermoFisher  | <a href="https://www.thermofisher.com/order/catalog/product/12935300?SID=srch-hj-12935300">https://www.thermofisher.com/order/catalog/product/12935300?SID=srch-hj-12935300</a>                                                                                                                                                     |
| Opti-MEM                                    | ThermoFisher  | <a href="https://www.thermofisher.com/order/catalog/product/31985070?SID=srch-srp-31985070">https://www.thermofisher.com/order/catalog/product/31985070?SID=srch-srp-31985070</a>                                                                                                                                                   |
| Lipofectamine RNAiMAX                       | ThermoFisher  | <a href="https://www.thermofisher.com/order/catalog/product/13778150?SID=srch-hj-13778150">https://www.thermofisher.com/order/catalog/product/13778150?SID=srch-hj-13778150</a>                                                                                                                                                     |
| FES TaqMan Gene Expression Assay            | ThermoFisher  | <a href="https://www.thermofisher.com/taqman-gene-expression/product/Hs00171375_m1?CID=&amp;ICID=&amp;subtype=">https://www.thermofisher.com/taqman-gene-expression/product/Hs00171375_m1?CID=&amp;ICID=&amp;subtype=</a>                                                                                                           |
| 18s rRNA TaqMan Gene Expression Assay       | ThermoFisher  | <a href="https://www.thermofisher.com/taqman-gene-expression/product/Hs99999901_s1">https://www.thermofisher.com/taqman-gene-expression/product/Hs99999901_s1</a>                                                                                                                                                                   |
| PHOS-Select Iron Affinity Gel               | Sigma-Aldrich | <a href="https://www.sigmaaldrich.com/GB/en/product/sigma/p9740">https://www.sigmaaldrich.com/GB/en/product/sigma/p9740</a>                                                                                                                                                                                                         |
| TMT10plex Isobaric Mass Tagging Kit         | ThermoFisher  | <a href="https://www.thermofisher.com/order/catalog/product/90113">https://www.thermofisher.com/order/catalog/product/90113</a>                                                                                                                                                                                                     |
